# Supplementary material for: Can the collection of expired long-lasting insecticidal nets reduce their coverage and use? Sociocultural aspects related to LLIN life cycle management and use in four districts in Madagascar
Source: Springer Nature journal article supplement (doi:10.1186/s12936-017-2053-z), 2017-10-10
Supplement: MOESM1 [file 15124140]

**Table 3. – Typology of Interviews and Focus Group Discussion by participant type and district**

|                      | In-Depth Formal Interviews (FI) |     |           |                |             | Focus Group Discussions (FGD) |     |       |                 |                    |              |
|----------------------|---------------------------------|-----|-----------|----------------|-------------|-------------------------------|-----|-------|-----------------|--------------------|--------------|
|                      | Community                       |     | Authority |                |             | Community                     |     |       |                 | Authority          |              |
|                      | Women                           | Men | Community | Administrative | Traditional | Women                         | Men | Mixed | Community Agent | Chief of Fokontany | Chief of BHC |
| <b>Betioky</b>       | <b>8</b>                        | 6   | 4         | 3              | -           | 3                             | 1   | 1     | -               | 1                  | -            |
| <b>Tsihombe</b>      | 8                               | 4   | 6         | 3              | -           | 2                             | 1   | -     | 2               | 1                  | -            |
| <b>Ambanja</b>       | 5                               | 3   | 1         | 1              | 1           | 1                             | 1   | -     | -               | -                  | 1            |
| <b>Fenerive Est.</b> | 8                               | 1   | 2         | 4              | -           | 1                             | 1   | 1     | -               | -                  | -            |
| <b>Total</b>         | 29                              | 14  | 13        | 11             | 1           | 7                             | 4   | 2     | 2               | 2                  | 1            |

BHC= Basic Health Center

FGD's were comprised of 2 or more people.
